# Supplementary material for: Putative positive role of inflammatory genes in fat deposition supported by altered gene expression in purified human adipocytes and preadipocytes from lean and obese adipose tissues
Source: PubMed Central journal article supplement (PMC7664034; doi:10.1186/s12967-020-02611-6), 2020-11-12
Supplement: 12967_2020_2611_MOESM2_ESM.pdf [file 12967_2020_2611_MOESM2_ESM.pdf]

**Table S1. Statistical thresholds tested for selecting DEGs**

| <b>Classes of DEGs</b>     | <b># of samples</b>             | <b>Q &lt; 0.01</b> | <b>Q &lt; 0.05</b> | <b>P &lt; 0.01</b> | <b>P &lt; 0.05</b> |
|----------------------------|---------------------------------|--------------------|--------------------|--------------------|--------------------|
| Class I:<br>AC-DEGs        | 11 O-AC/12 L-AC                 | 66                 | 314                | 1,198*             | 2,999              |
| Class II:<br>preAC-DEGs    | 10 O-preAC/3 L-preAC            | 0                  | 2                  | 213*               | 912                |
| Class III:<br>Lean_Ag-DEGs | 8 L <sub>e</sub> -AC/3 L-preAC  | 8,448*             | 10,007             | 9,124              | 10,729             |
| Class IV:<br>Obese_Ag-DEGs | 7 O <sub>e</sub> -AC/10 O-preAC | 10,234*            | 11,561             | 10,724             | 12,062             |

\* indicate the thresholds that were chosen for further analyses described in the main text.
