# Supplementary material for: Putative positive role of inflammatory genes in fat deposition supported by altered gene expression in purified human adipocytes and preadipocytes from lean and obese adipose tissues
Source: PubMed Central journal article supplement (PMC7664034; doi:10.1186/s12967-020-02611-6), 2020-11-12
Supplement: 12967_2020_2611_MOESM3_ESM.pdf [file 12967_2020_2611_MOESM3_ESM.pdf]

**Table S2. The sample information used for the present analysis**

|                   | <b>Group</b>       | <b>Samples</b>                                 |
|-------------------|--------------------|------------------------------------------------|
| AC                | L <sub>e</sub> -AC | #5, #29, #34, #37, #38, #39, #43, #46          |
|                   | I-AC               | <b>#9, #24, #30, #35, #36, #40, #42, #51</b>   |
|                   | O <sub>e</sub> -AC | #3, #11, #25, #32, #41, #49, #50               |
| preAC             | L-preAC            | #2, #10, #13                                   |
|                   | O-preAC            | #4, #8, #12, #18, #19, #20, #21, #33, #53, #54 |
| Lean_<br>Ag-DEGs  | L-preAC            | #2, #10, #13                                   |
| Obese_<br>Ag-DEGs | L <sub>e</sub> -AC | #5, #29, #34, #37, #38, #39, #43, #46          |
|                   | O-preAC            | #4, #8, #12, #18, #19, #20, #21, #33, #53, #54 |
|                   | O <sub>e</sub> -AC | #3, #11, #25, #32, #41, #49, #50               |

Samples highlighted with the bold face and underline in the 'I-AC' category indicate the sample information that was originally assigned as lean and obese, respectively.
