# Supplementary material for: Putative positive role of inflammatory genes in fat deposition supported by altered gene expression in purified human adipocytes and preadipocytes from lean and obese adipose tissues
Source: PubMed Central journal article supplement (PMC7664034; doi:10.1186/s12967-020-02611-6), 2020-11-12
Supplement: 12967_2020_2611_MOESM4_ESM.pdf [file 12967_2020_2611_MOESM4_ESM.pdf]

**Table S3. Statistical thresholds used for testing to select three subcategories of AC-DEGs**

| <b>Subcategories of AC-DEGs</b> | <b>Q &lt; 0.01</b> | <b>Q &lt; 0.05</b> | <b>P &lt; 0.01</b> | <b>P &lt; 0.05</b> |
|---------------------------------|--------------------|--------------------|--------------------|--------------------|
| LO-DEGs                         | 2,657*             | 4,603              | 4,441              | 6,603              |
| LI-DEGs                         | 152                | 603                | 1,474*             | 3,318              |
| O-DEGs                          | 691                | 1,324*             | 1,877              | 3,469              |

\* indicate the thresholds that were chosen for creating heatmaps and further analyses described in the main text.
