# Supplementary material for: Putative positive role of inflammatory genes in fat deposition supported by altered gene expression in purified human adipocytes and preadipocytes from lean and obese adipose tissues
Source: PubMed Central journal article supplement (PMC7664034; doi:10.1186/s12967-020-02611-6), 2020-11-12
Supplement: 12967_2020_2611_MOESM11_ESM.pdf [file 12967_2020_2611_MOESM11_ESM.pdf]

**Table S6. Statistical summary of the clinical information**

|                                                  | Lean                           | Obese             | <i>P</i> |
|--------------------------------------------------|--------------------------------|-------------------|----------|
| <b>For Lean vs. Obese in AC</b>                  |                                |                   |          |
| <i>n</i>                                         | 12                             | 11                |          |
| Age (years)                                      | 64.2 ± 6.01 <sup>a</sup>       | 61.1 ± 7.58       | ns       |
| Weight (kg)                                      | 58.8 ± 7.83                    | 78.3 ± 7.52       | **       |
| BMI (kg/m <sup>2</sup> )                         | 22.5 ± 1.47                    | 29.1 ± 3.23       | **       |
| FBS (mmol/L)                                     | 95 ± 19.8                      | 122 ± 35.6        | *        |
| C-pep (ng/dL)                                    | 2.10 ± 1.64                    | 2.86 ± 0.89       | ns       |
| HDL (mg/dL)                                      | 28.5 ± 10.5                    | 31 ± 12           | ns       |
| LDL (mg/dL)                                      | 94.3 ± 32.5                    | 82.4 ± 28.3       | ns       |
| CRP (mg/dL)                                      | 0.28 (0.14, 0.43) <sup>b</sup> | 0.24 (0.1, 0.31)  | ns       |
| <b>For Lean vs. Obese in preAC</b>               |                                |                   |          |
| <i>n</i>                                         | 3                              | 10                |          |
| Age (years)                                      | 70 (66, 71.5)                  | 63.5 (59.8, 65.8) | ns       |
| Weight (kg)                                      | 53.1 (44.7, 55.2)              | 76.8 (72.3, 86.7) | **       |
| BMI (kg/m <sup>2</sup> )                         | 19.2 (15.8, 21.5)              | 29.5 (27.3, 31.2) | **       |
| FBS (mmol/L)                                     | 100 (96.5, 104)                | 120 (104, 147)    | ns       |
| C-pep (ng/dL)                                    | 1.38 (1.13, 1.64)              | 2.1 (1.3, 3.4)    | ns       |
| HDL (mg/dL)                                      | 41.5 (38.3, 44.8)              | 33 (28, 39)       | ns       |
| LDL (mg/dL)                                      | 74 (66, 82)                    | 109 (105, 123)    | ns       |
| CRP (mg/dL)                                      | NA                             | NA                |          |
| <b>For L<sub>e</sub> vs. O<sub>e</sub> in AC</b> |                                |                   |          |
| <i>n</i>                                         | 8                              | 7                 |          |
| Age (years)                                      | 63.7 ± 6.21                    | 63.7 ± 4.79       | ns       |
| Weight (kg)                                      | 59.8 ± 6.78                    | 79.7 ± 6.99       | **       |
| BMI (kg/m <sup>2</sup> )                         | 22.5 ± 1.56                    | 29.5 ± 3.74       | **       |
| FBS (mmol/L)                                     | 102 ± 15.7                     | 124 ± 26.1        | ns       |
| C-pep (ng/dL)                                    | 2.14 ± 1.94                    | 2.82 ± 1.11       | ns       |
| HDL (mg/dL)                                      | 23.7 ± 8.91                    | 25.8 ± 8.35       | ns       |
| LDL (mg/dL)                                      | 81.9 ± 23.4                    | 86.6 ± 63.3       | ns       |
| CRP (mg/dL)                                      | 0.24 (0.14, 0.38)              | 0.1 (0.1, 0.24)   | ns       |

a, standard deviation; b, inter quartile range; ns, no significance; \*\*, *p* < 0.05; \*\*\*, *p* < 0.01
