# Supplementary material for: Putative positive role of inflammatory genes in fat deposition supported by altered gene expression in purified human adipocytes and preadipocytes from lean and obese adipose tissues
Source: PubMed Central journal article supplement (PMC7664034; doi:10.1186/s12967-020-02611-6), 2020-11-12
Supplement: 12967_2020_2611_MOESM12_ESM.pdf [file 12967_2020_2611_MOESM12_ESM.pdf]

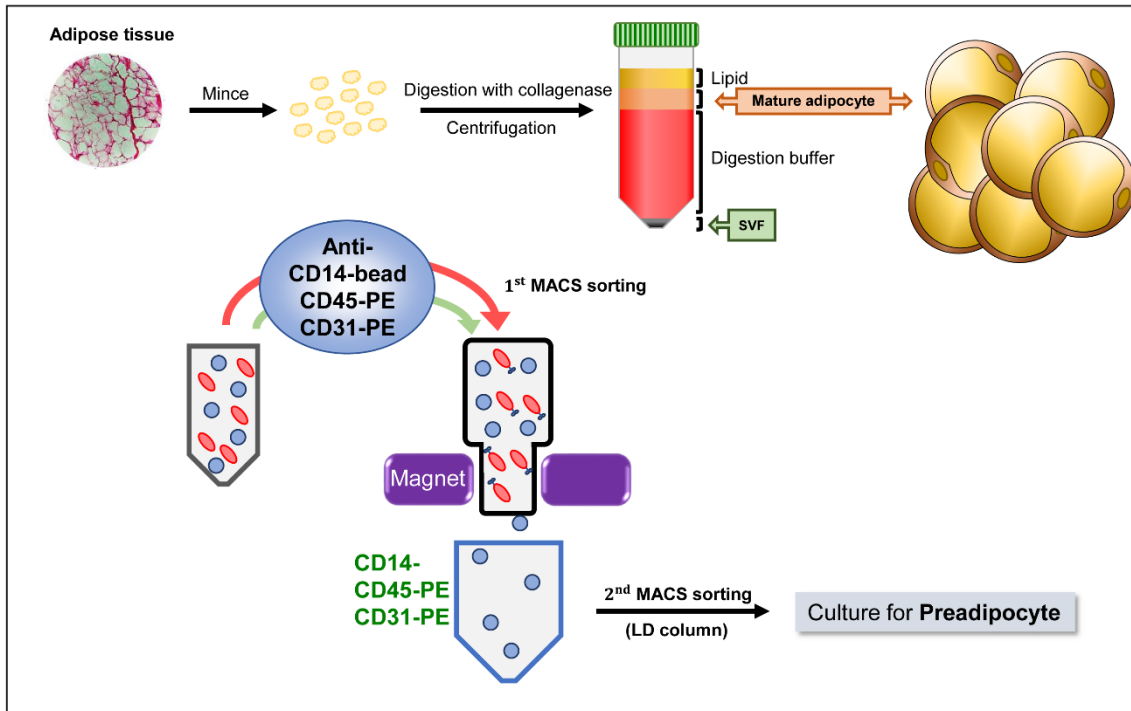

**Figure S6. Schematic of the purification of AC and preAC cells from AT**

Refer to the Materials and methods section for the detailed procedures depicted in this schematic.
